# Supplementary material
Source: PubMed Central journal article supplement (PMC3830642)
Supplement: NIHMS511756-supplement-1_si_001.pdf [file NIHMS511756-supplement-1_si_001.pdf]

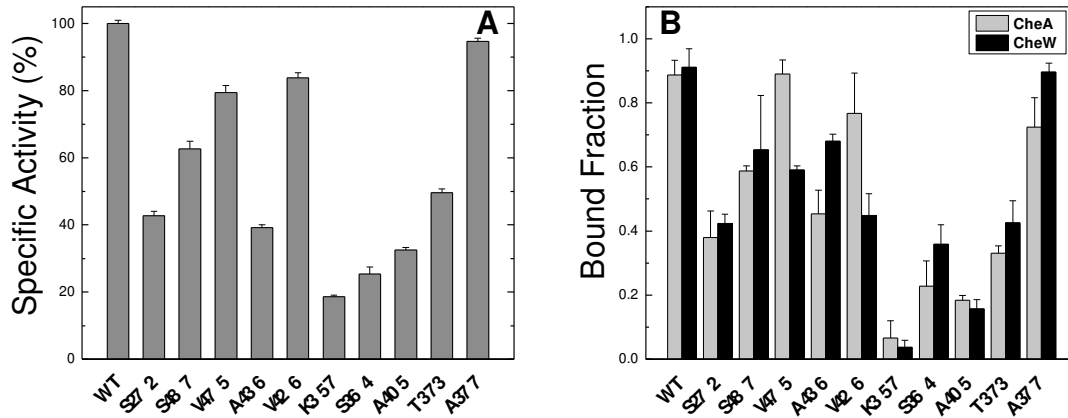

**Figure S1.** Activity measurements of Cys mutant series. **(A)** Kinase activity of CheA (specific activity per total CheA as a percent of the wild type activity of  $25 \text{ s}^{-1}$ ) in the vesicle-assembled complexes. **(B)** Fractional binding of CheA (gray) or CheW (black) to wild type and Cys mutant CF constructs assembled on vesicles, as determined by SDS-PAGE. Assembly conditions were  $30 \mu\text{M}$  CF4E,  $1.2 \mu\text{M}$  CheA,  $10 \mu\text{M}$  CheW. Vesicles were present at  $580 \mu\text{M}$  total lipid of a 1:1 DOPC:DGS-NTA-Ni composition. Averages and standard deviations computed from triplicate samples (activity) or duplicate samples (binding) assayed in separate experiments.

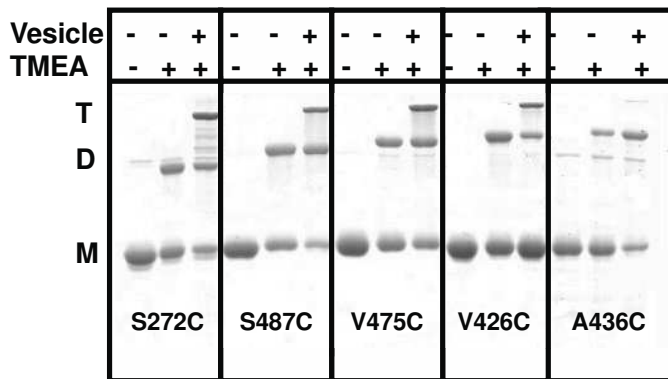

**Figure S2.** Gel resolving TMEA crosslinking products. Monomers (M), dimers (D), and trimers (T) resulting from reactions for the control (pre-quenched with NEM) and samples treated with  $10 \mu\text{M}$  TMEA without or with vesicles, under the conditions described for Figure 6.

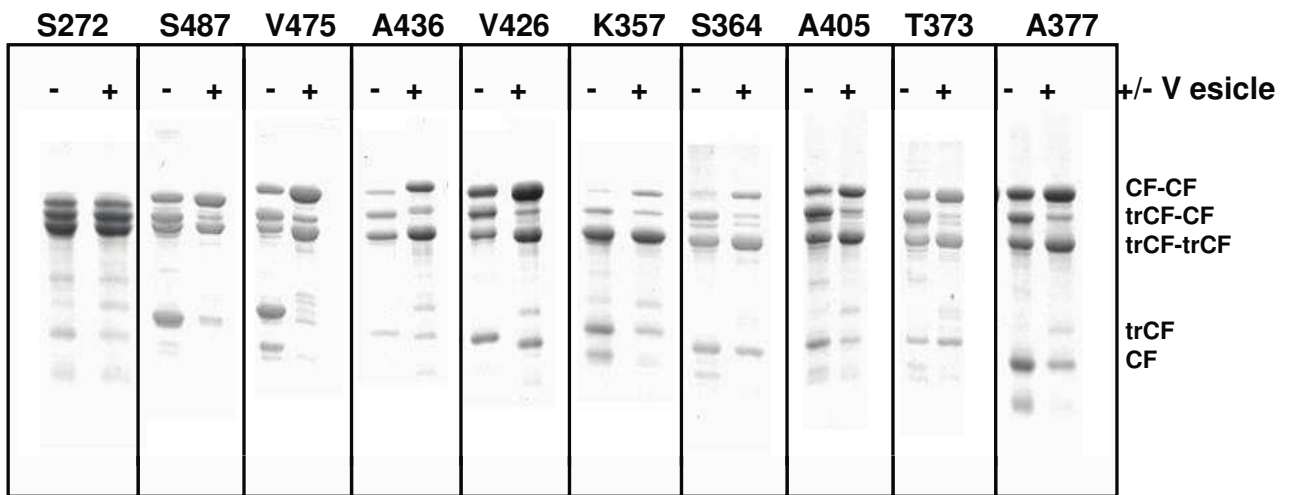

**Figure S3** Gels resolving homodimers and heterodimers. Diamide crosslinking with trTarS272C was performed as described in Fig 7 legend and bands were resolved on 8% gels.

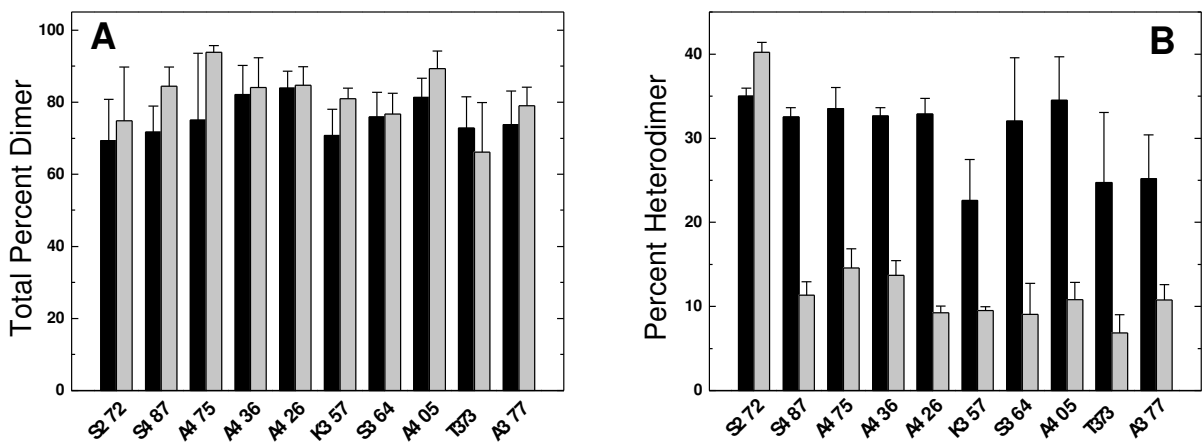

**Figure S4.** Suppression of CF heterodimer formation on vesicles. **(A)** Extent of total dimer formation with trTsrS274C, expressed as the percent of CF and trCF in dimeric form, in solution and on vesicles (dark and light columns, respectively). **(B)** Percent heterodimer formation with trTsrS274C in solution and on vesicles (dark and light columns, respectively). CFs were present at 15  $\mu$ M in each pair (30  $\mu$ M total), with a diamide concentration of 300  $\mu$ M for 30 minutes at 25  $^{\circ}$ C. Averages and standard deviations computed from three different assays .

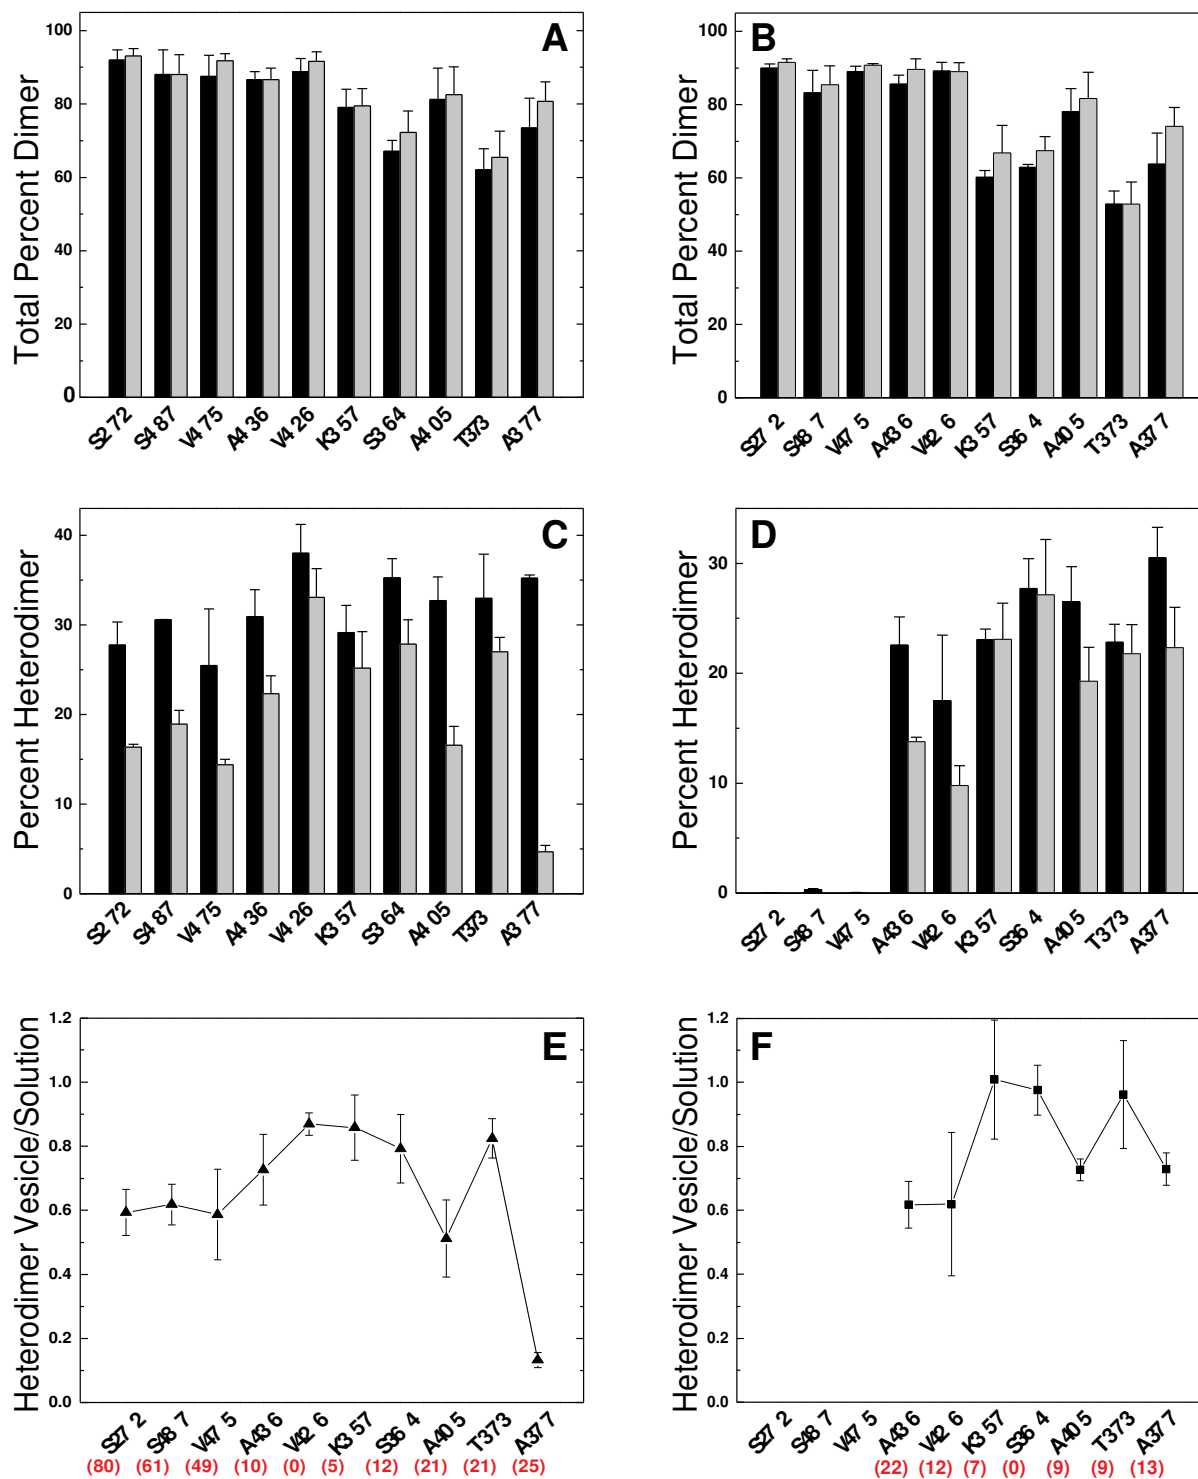

**Figure S5.** Suppression of CF heterodimer formation on vesicles for V426C and S364C sites. Extent of total dimer formation with **(A)** trTarV426C and **(B)** trTarS364C, expressed as the percent of CF and trCF in dimeric form, in solution and on vesicles (dark and light columns, respectively). Percent heterodimer formation with **(C)** trTarV426C and **(D)** trTarS364C in solution and on vesicles (dark and light columns, respectively). CFs were present at 15  $\mu$ M in each pair (30  $\mu$ M total), with a diamide concentration of 300  $\mu$ M for 30 minutes at 25  $^{\circ}$ C. Ratio of heterodimer formation (on vesicles/in solution) for all sites with **(E)** trTarV426C and **(F)** trTarS364C. Intervening number of residues between sites (assuming helical hairpin structure with turn at TarE389) are listed (red) below each site. Averages and standard deviations computed from three different assays.
